# Supplementary material for: Carbon Electrodes with Gold Nanoparticles for the Electrochemical Detection of miRNA 21-5p
Source: MDPI journal article supplement (doi:10.3390/chemosensors10050189), 2022-05-19
Supplement: s1 [file s1]

# Supplementary information

to

## Carbon Electrodes with Gold Nanoparticles for the Electrochemical Detection of miRNA-21-5p

Verónica Morgado Serrano <sup>1</sup>, Inês Simões Patrício Silva <sup>1</sup>, Ana Rita Cardoso <sup>1,2</sup>  
and Maria Goreti Ferreira Sales <sup>1,2,\*</sup>

<sup>1</sup> BioMark@UC/CEB-LABELS, Faculty of Sciences and Technology, University of Coimbra, 3030-790 Coimbra, Portugal; vm serrano@uc.pt (V.M.S.); isilva@student.uc.pt (I.S.P.S.); uc45752@uc.pt (A.R.C.)

<sup>2</sup> BioMark@ISEP/CEB-LABELS, School of Engineering, Polytechnic Institute of Porto, 4249-015 Porto, Portugal

\* Correspondence: goreti.sales@eq.uc.pt or goreti.sales@gmail.com

\* To whom correspondence should be addressed. Email addresses: [goreti.sales@eq.uc.pt](mailto:goreti.sales@eq.uc.pt), [goreti.sales@gmail.com](mailto:goreti.sales@gmail.com) (M. G. F. Sales).

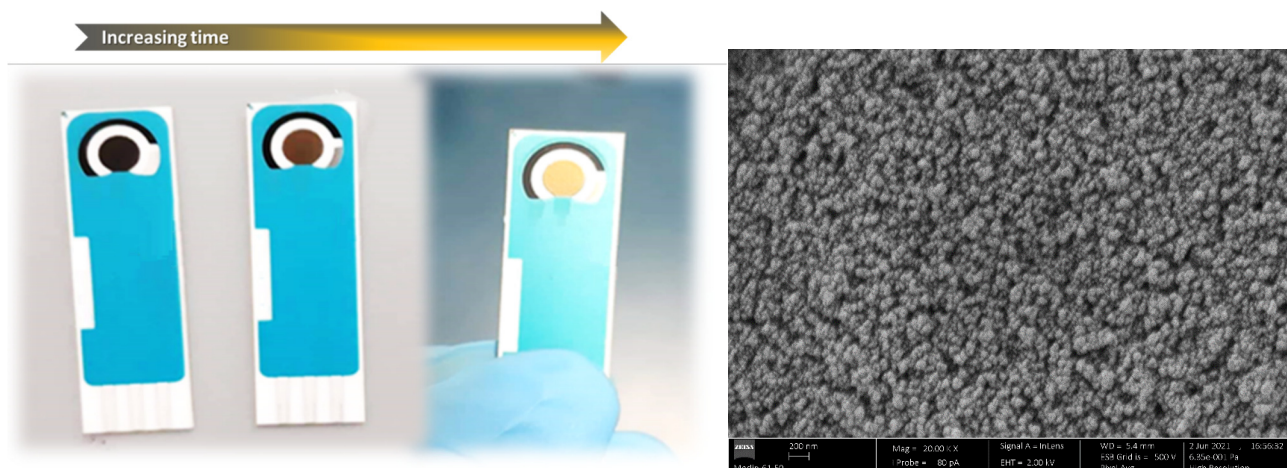

**Figure S1:** Pictures (left) of the carbon screen-printed electrodes highlighting the effect of time on the electrodeposition of gold on working electrodes and SEM analysis of one of the conditions tested (not the optimum condition selected).

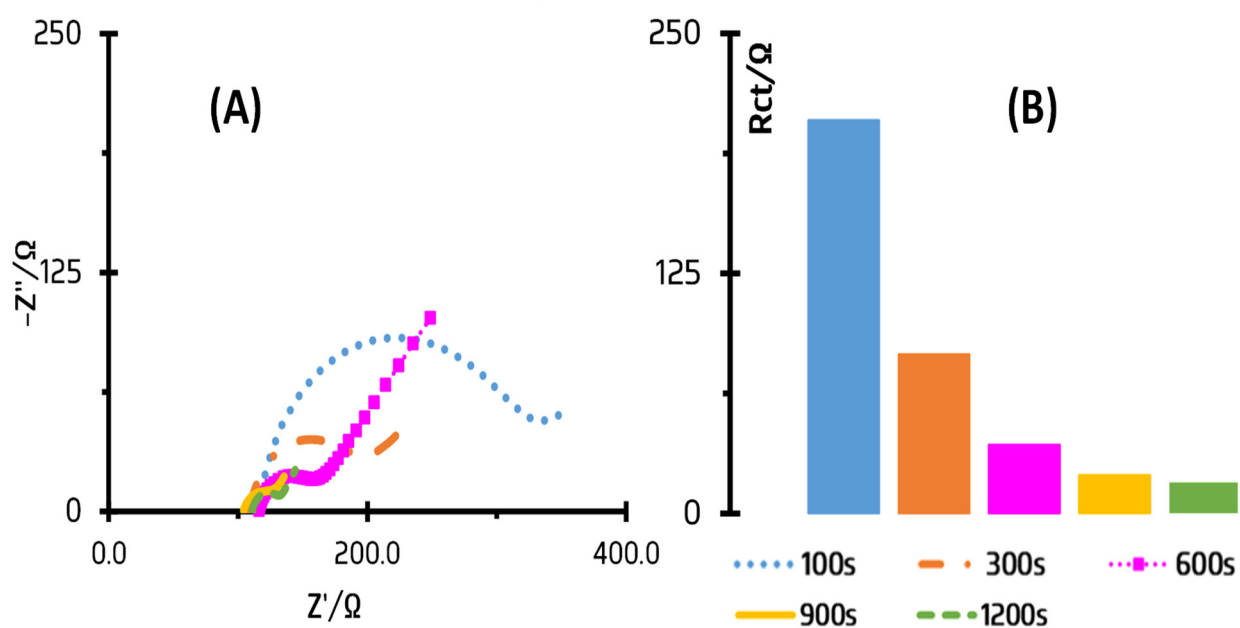

**Figure S2** – (A) -Electrodeposition time curves at AuNPs modified C-SPE; (B) – Charge transfer resistance after electrodeposition.

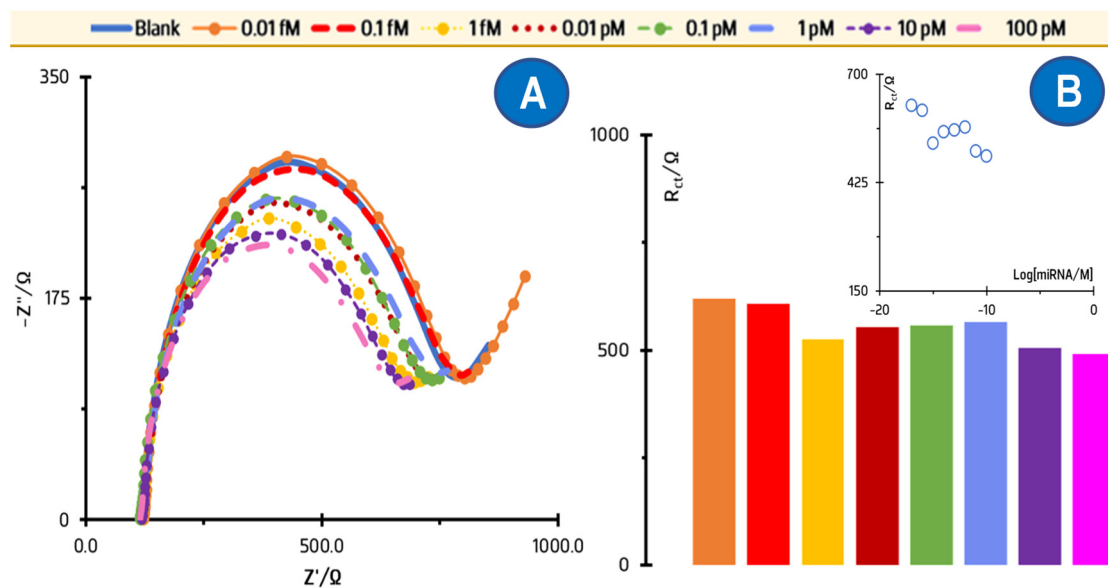

**Figure S3-** A- EIS changes corresponding to the different miRNA 21-5p concentrations; B- Charge transfer resistance of each concentration (100s AuNPs electrodeposition).

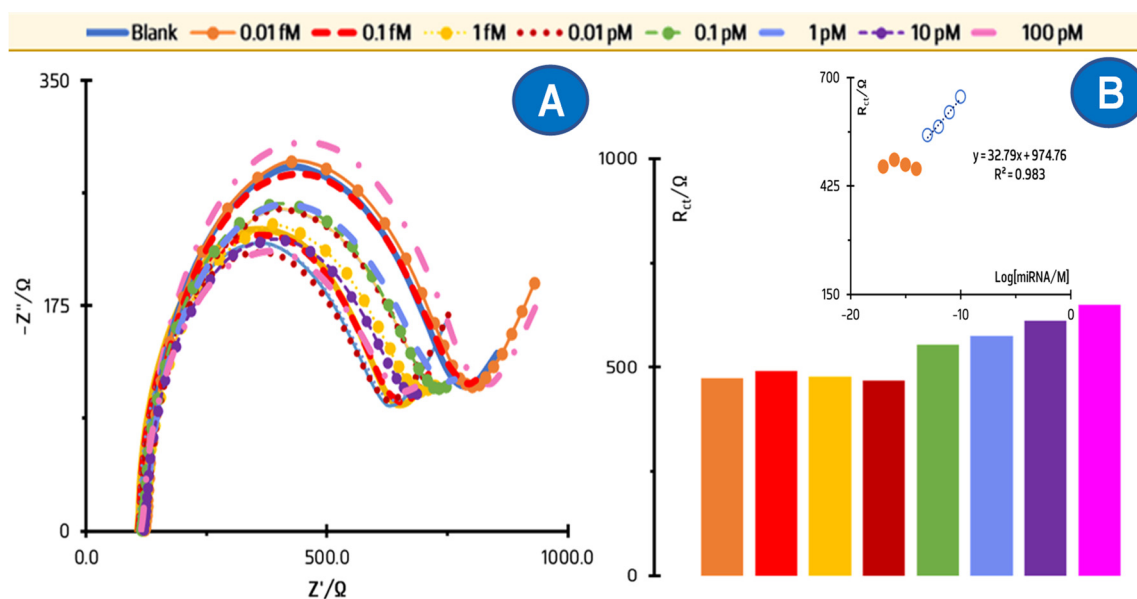

**Figure S4-A-** EIS changes corresponding to the different miRNA 21-5p concentrations; **B-** Charge transfer resistance of each concentration (300s AuNPs electrodeposition).

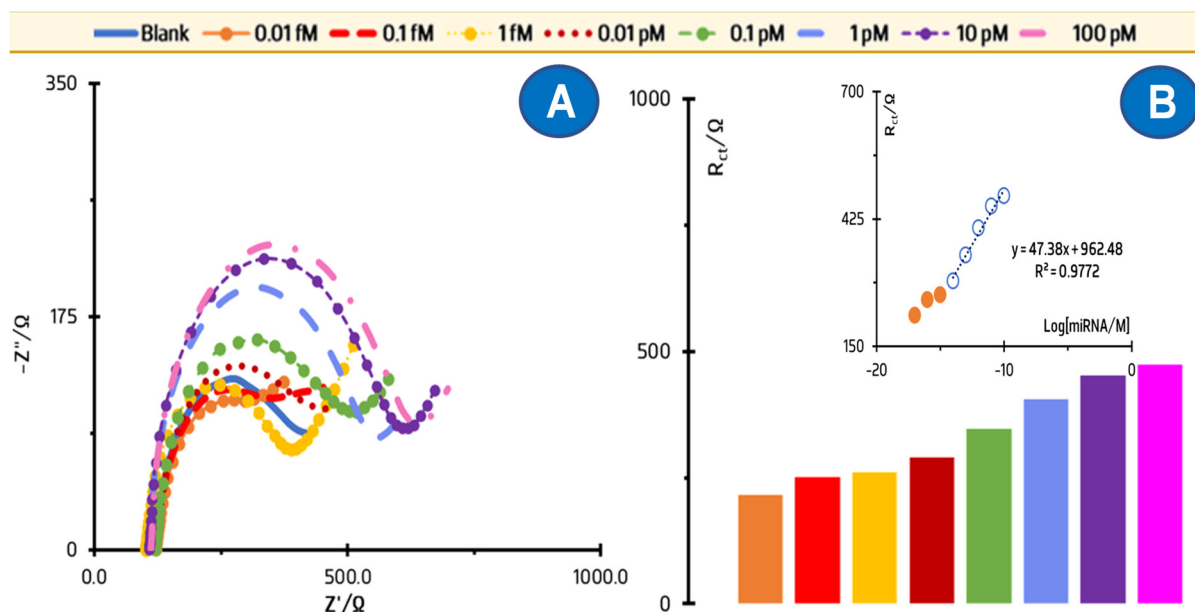

**Figure S5:** A- EIS changes corresponding to the different miRNA 21-5p concentrations; B- Charge transfer resistance of each concentration (600s AuNPs electrodeposition).

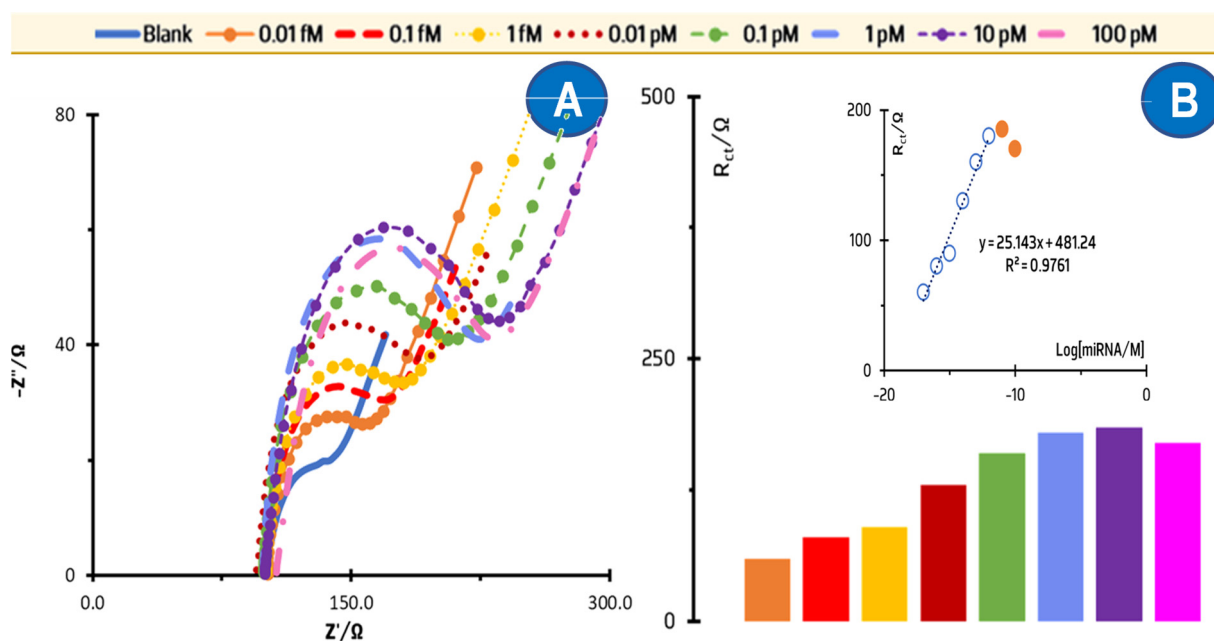

**Figure S6-** A- EIS changes corresponding to the different miRNA 21-5p concentrations; B- Charge transfer resistance of each concentration (1200s AuNPs electrodeposition).

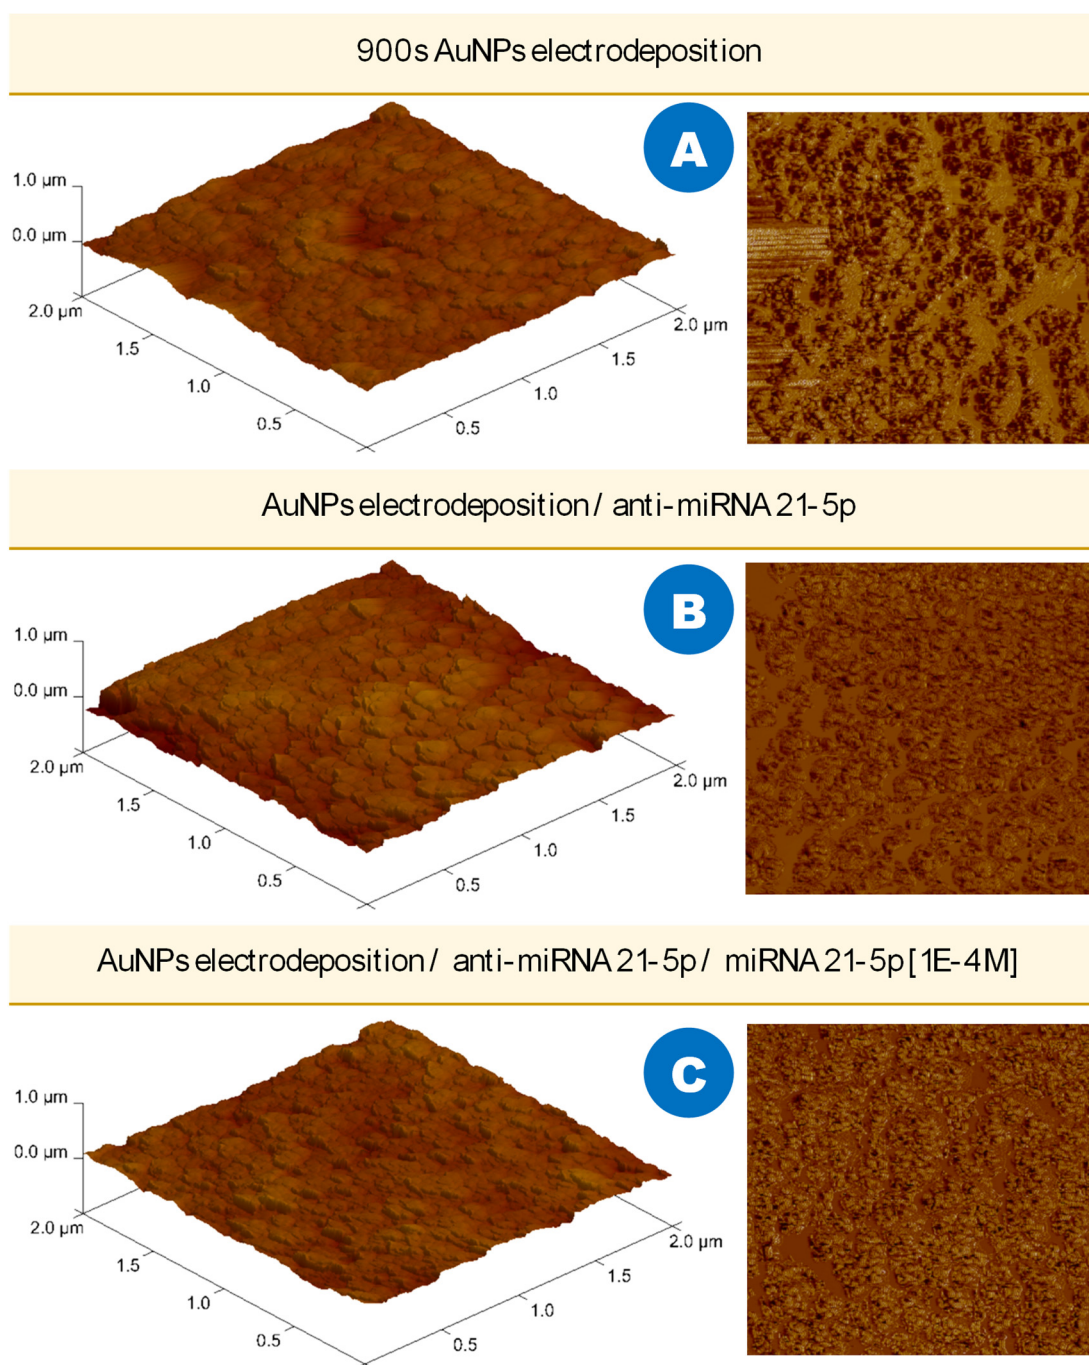

**Figure S7:** AFM scans of AuNPs electrodeposition in 3D (left) and 2D (right) views of the different stages. (A)- 900s AuNPs electrodeposition (B)- 900s AuNPs electrodeposition/anti-miRNA 21-5p (C)- 900s AuNPs electrodeposition/anti-miRNA 21-5p/miRNA 21-5p.
